# Supplementary material for: The roles of different titanium species in TS-1 zeolite in propylene epoxidation studied by in situ UV Raman spectroscopy
Source: Royal Society of Chemistry journal article supplement (doi:10.1039/c5cp05268h), 2015-11-17
Supplement: c5cp05268h1.pdf [file c5cp05268h1.pdf]

## Supporting Information

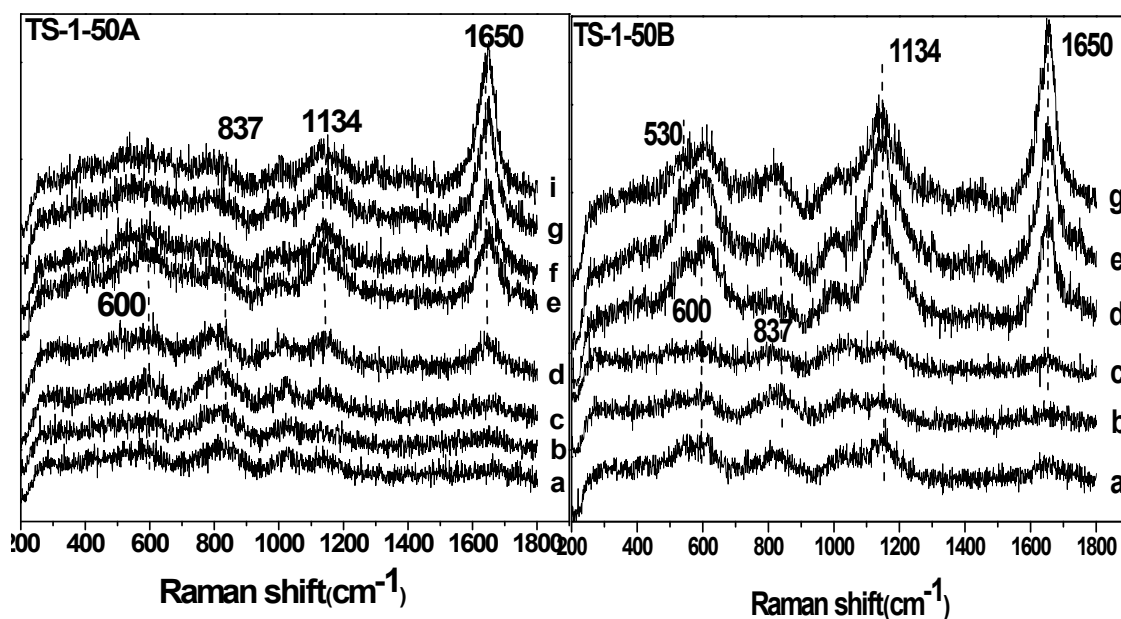

**Fig. S1** In situ Raman spectra of the TS-1 /H<sub>2</sub>O<sub>2</sub>/H<sub>2</sub>O/CH<sub>3</sub>OH system obtained at different times during the methanol-included epoxidation reaction, collected with a 244 nm laser: (a) Raman spectrum obtained at the 6<sup>th</sup> minute, (b) 12<sup>th</sup> minute, (c) 18<sup>th</sup> minute, (d) 25<sup>th</sup> minute, (e) 32<sup>th</sup> minute, (f) 38<sup>th</sup> minute, (g) 46<sup>th</sup> minute, (h) 54<sup>th</sup> minute and (i) 60<sup>th</sup> minute.

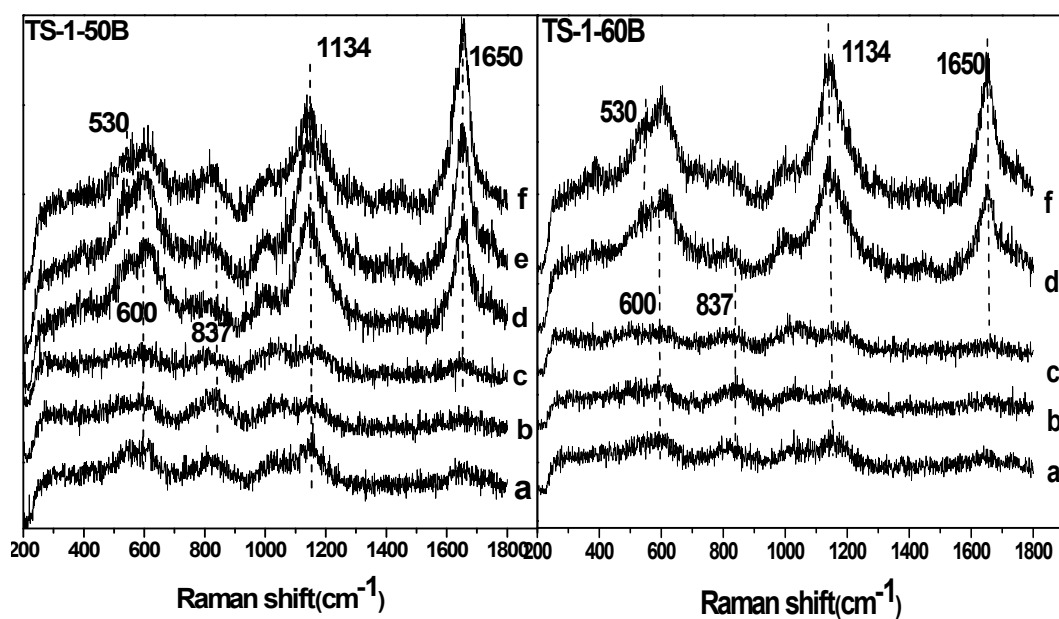

**Fig. S2** In situ Raman spectra of the TS-1 /H<sub>2</sub>O<sub>2</sub>/H<sub>2</sub>O/CH<sub>3</sub>OH system obtained at different times during the methanol-included epoxidation reaction, collected with a 244 nm laser: (a) Raman spectrum obtained at the 6<sup>th</sup> minute, (b) 12<sup>th</sup> minute, (c) 18<sup>th</sup> minute, (d) 25<sup>th</sup> minute, (e) 32<sup>th</sup> minute, (f) 54<sup>th</sup> minute.
